# Supplementary material for: Cerebral Vitamin B5 (D-Pantothenic Acid) Deficiency as a Potential Cause of Metabolic Perturbation and Neurodegeneration in Huntington’s Disease
Source: PubMed Central journal article supplement (PMC6630497; doi:10.3390/metabo9060113), 2019-06-11
Supplement: metabolites-09-00113-s001.pdf [file metabolites-09-00113-s001.pdf]

## Supplementary materials

### Cerebral vitamin B5 (D-pantothenic acid) deficiency as a potential cause of metabolic perturbation and neurodegeneration in Huntington's disease

**Stefano Patassini**<sup>1, 4, 6</sup>, **Paul Begley**<sup>1</sup>, **Jingshu Xu**<sup>1, 2</sup>, **Stephanie J. Church**<sup>1</sup>, **Nina Kureishy**<sup>1</sup>, **Suzanne J. Reid**<sup>3, 4</sup>, **Henry J. Waldvogel**<sup>3</sup>, **Richard L. M. Faull**<sup>3</sup>, **Russell G. Snell**<sup>3, 4</sup>, **Richard D. Unwin**<sup>1</sup> and **Garth J. S. Cooper**<sup>1, 2, 4, 5\*</sup>.

<sup>1</sup> Centre for Advanced Discovery and Experimental Therapeutics, Division of Cardiovascular Sciences, School of Medical Sciences, Faculty of Biology, Medicine & Health, The University of Manchester, Manchester, United Kingdom

<sup>2</sup> Manchester Cancer Research Centre Building, The University of Manchester, Manchester, United Kingdom

<sup>3</sup> Centre for Brain Research and Department of Anatomy and Medical Imaging, Faculty of Medical and Health Sciences, University of Auckland, Auckland, New Zealand

<sup>4</sup> School of Biological Sciences, Faculty of Science, University of Auckland, Auckland, New Zealand

<sup>5</sup> Maurice Wilkins Centre for Molecular Biodiscovery, University of Auckland, Auckland, New Zealand

<sup>6</sup> Present address: Owlstone Medical, Cambridge Science Park, Cambridge, United Kingdom

\*Correspondence: [garth.cooper@manchester.ac.uk](mailto:garth.cooper@manchester.ac.uk)

| N  | Status  | Age | Gender | Cause of death           | Grade | CAG repeats | PMD (h) | Brain Weight (g) |
|----|---------|-----|--------|--------------------------|-------|-------------|---------|------------------|
| 1  | Control | 42  | M      | Chest trauma             | -     | N/D         | 14      | 1403             |
| 2  | Control | 61  | M      | Ischaemic heart disease  | -     | 17/19       | 7       | 1258             |
| 3  | Control | 72  | F      | Myocardial infarction    | -     | 17/19       | 19      | 1264             |
| 4  | Control | 63  | F      | Aortic aneurysm          | -     | 14/16       | 16      | 1324             |
| 5  | Control | 73  | M      | Ischaemic heart disease  | -     | 17/23       | 13      | 1315             |
| 6  | Control | 89  | M      | Coronary atherosclerosis | -     | 17/19       | 19      | 1430             |
| 7  | Control | 66  | M      | Ischaemic heart disease  | -     | 15/20       | 15      | 1360             |
| 8  | Control | 77  | F      | Ischaemic heart disease  | -     | N/D         | 13      | 1184             |
| 9  | Control | 81  | M      | Coronary atherosclerosis | -     | 15/18       | 7       | 1343             |
| 10 | Control | 43  | F      | Nitrogen poisoning       | -     | 17/17       | 26      | 1318             |
| 11 | Control | 59  | M      | Aortic aneurysm          | -     | 17/18       | 24.5    | 1490             |
| 12 | Control | 60  | M      | Ischaemic heart disease  | -     | 10/17       | 17      | 1370             |
| 13 | Control | 48  | M      | Ischaemic heart disease  | -     | 17/20       | 23      | 1470             |
| 14 | Control | 53  | M      | Ischaemic heart disease  | -     | N/D         | 16.5    | 1215             |
| 15 | Control | 78  | F      | Aortic aneurysm          | -     | 18/19       | 20      | 1292             |
| 16 | Control | 56  | M      | Asphyxia                 | -     | N/D         | 23      | 1358             |
| 17 | Control | 57  | F      | Carcinomatosis           | -     | N/D         | 32      | 1243             |
| 18 | Control | 41  | M      | Heart disease            | -     | N/D         | 16      | 1171             |
| 19 | Control | 41  | M      | Asphyxia                 | -     | 18/22       | 16      | 1412             |
| 20 | HD      | 54  | M      | Pneumonia                | 2     | 20/39       | 6.5     | 1272             |
| 21 | HD      | 67  | F      | Myocardial infarction    | 1     | 15/42       | 9       | 1139             |
| 22 | HD      | 59  | F      | Pneumonia                | 4     | 23/47       | 7       | 787              |
| 23 | HD      | 62  | F      | Pneumonia                | 3     | 17/45       | 11      | 826              |
| 24 | HD      | 62  | M      | N/D                      | 2     | 18/43       | 9       | 992              |
| 25 | HD      | 83  | M      | Pneumonia                | 1     | 17/42       | 13      | 1168             |
| 26 | HD      | 58  | M      | Pneumonia                | 2     | 28/44       | 14      | 1497             |
| 27 | HD      | 51  | M      | Pneumonia                | 2     | 10/46       | 15      | 1200             |
| 28 | HD      | 65  | M      | Renal failure            | 2     | 17/43       | 14      | 1224             |
| 29 | HD      | 63  | M      | Pulmonary embolism       | 3     | 22/43       | 16      | 1226             |
| 30 | HD      | 45  | F      | Choking                  | 2     | 24/43       | 15      | 1014             |
| 31 | HD      | 64  | M      | Pulmonary embolism       | 3     | 27/42       | 20.5    | 1252             |
| 32 | HD      | 53  | F      | Pneumonia                | 2     | 21/47       | 12      | 961              |
| 33 | HD      | 45  | M      | Pneumonia                | 4     | 20/49       | 18      | 950              |
| 34 | HD      | 72  | M      | Pneumonia                | 1     | 17/41       | 5       | 1190             |
| 35 | HD      | 53  | F      | Pneumonia                | 4     | 17/53       | 9       | 1010             |
| 36 | HD      | 56  | M      | Pneumonia                | 2     | 16/46       | 16      | 1053             |
| 37 | HD      | 44  | M      | Pneumonia                | 4     | 20/51       | 29      | 1147             |
| 38 | HD      | 48  | M      | Pneumonia                | 3     | 20/45       | 18      | 1010             |
| 39 | HD      | 64  | M      | Pneumonia                | 3     | 18/44       | 19      | 1250             |
| 40 | HD      | 63  | F      | N/D                      | 3     | 23/44       | 5.5     | 955              |
| 41 | HD      | 51  | M      | Dehydration              | 3     | 17/48       | 15.5    | 1007             |
| 42 | HD      | 71  | M      | Pneumonia                | 2     | 19/42       | 16      | 1259             |
| 43 | HD      | 50  | F      | Pneumonia                | 2     | 16/46       | 20      | 1120             |
| 44 | HD      | 91  | F      | Dehydration              | 2     | 15/40       | 18      | 869              |
| 45 | HD      | 65  | M      | Pneumonia                | 2     | 18/46       | 6       | 900              |
| 46 | HD      | 57  | F      | Myocardial infarction    | 2     | 17/44       | 19      | 1085             |
| 47 | HD      | 62  | M      | Pulmonary embolism       | 0     | 27/41       | 19      | 1180             |
| 48 | HD      | 43  | F      | Renal failure            | 3     | 21/49       | 3.5     | 970              |
| 49 | HD      | 47  | M      | Myocardial infarction    | 3     | 19/51       | 41      | 1230             |

**Supplementary Table S1.** Table illustrating clinical information and metadata for the cases used in this study. Abbreviation: *PMD*, post-mortem delay; *N/D*, not declared.

| Group of metabolite                       | CB          |         | SFG         |         |
|-------------------------------------------|-------------|---------|-------------|---------|
|                                           | Fold change | p-value | Fold change | p-value |
| <b>Glucose metabolites &amp; pentoses</b> |             |         |             |         |
| Fructose                                  | 2.5         | 0.0015  | 2.8         | 0.0001  |
| Sorbitol                                  | 2.6         | 0.0023  | 2.2         | 0.0426  |
| Glucose                                   | 1.2         | 0.4754  | 1.3         | 0.1602  |
| Glucose-6-phosphate                       | 2.1         | 0.0312  | 3.9         | 0.0002  |
| Ribose-5-phosphate                        | 0.8         | 0.1371  | 0.8         | 0.0141  |
| <b>Alternative fuel source</b>            |             |         |             |         |
| $\beta$ -Hydroxybutyric acid              | 1.4         | 0.1802  | 1.4         | 0.2703  |
| Glycerol                                  | 0.8         | 0.0045  | 0.8         | 0.0577  |
| Threitol                                  | 1.4         | 0.0057  | 1.5         | 0.0001  |
| Glycerol-3-phosphate                      | 1.8         | 0.0049  | 2.5         | 0.0001  |
| Glycerol-2-phosphate                      | 1.3         | 0.0447  | 2.5         | <0.0001 |
| Scyllo-inositol                           | 0.6         | 0.0002  | 0.7         | 0.0093  |
| Myo-inositol                              | 0.9         | 0.2286  | 0.9         | 0.3818  |
| N-acetylglucosamine                       | 0.9         | 0.6699  | 1.0         | 0.8770  |
| Ribitol                                   | 0.6         | 0.0013  | 0.8         | 0.0075  |
| Arabitol                                  | 0.8         | 0.0224  | 0.9         | 0.1252  |
| Mannitol                                  | 1.6         | 0.0099  | 1.5         | 0.0493  |
| Lactic acid                               | 1.0         | 0.9306  | 1.1         | 0.7432  |
| Disaccharide                              | 2.7         | 0.0322  | 0.6         | 0.1356  |
| <b>TCA &amp; Urea cycle and related</b>   |             |         |             |         |
| Fumaric acid                              | 1.5         | 0.0061  | 1.2         | 0.0510  |
| Citric acid                               | 1.6         | 0.0181  | 1.1         | 0.3966  |
| Malic acid                                | 1.4         | 0.0733  | 0.9         | 0.4695  |
| Urea                                      | 2.7         | 0.0008  | 2.7         | 0.0014  |
| Ornithine                                 | 0.5         | 0.0377  | 0.9         | 0.5132  |
| N-acetylglutamic acid                     | 0.7         | 0.0088  | 0.8         | 0.0273  |
| Creatinine                                | 0.8         | 0.1590  | 1.0         | 0.9226  |
| Pyruvic acid                              | 0.9         | 0.5431  | 1.5         | 0.0743  |
| Succinic acid                             | 0.7         | 0.0290  | 1.0         | 0.8449  |
| <b>Amino acids</b>                        |             |         |             |         |
| Glycine                                   | 0.8         | 0.3254  | 0.9         | 0.3828  |
| Leucine                                   | 0.7         | 0.1381  | 1.0         | 0.8292  |
| Isoleucine                                | 0.6         | 0.0019  | 0.7         | 0.1506  |
| Serine                                    | 0.5         | 0.0004  | 0.8         | 0.0450  |
| Threonine                                 | 0.7         | 0.0033  | 0.8         | 0.1175  |
| Aspartic acid                             | 0.6         | 0.0204  | 0.8         | 0.1207  |
| Methionine                                | 0.4         | 0.0013  | 0.8         | 0.2702  |
| Pyroglutamic acid                         | 1.0         | 0.9832  | 1.0         | 0.8469  |
| Phenylalanine                             | 0.7         | 0.0989  | 1.2         | 0.2461  |
| Proline                                   | 0.7         | 0.0545  | 0.9         | 0.5670  |
| N-acetylaspartic acid                     | 0.9         | 0.0621  | 0.8         | 0.0012  |
| Lysine                                    | 0.5         | 0.0110  | 1.0         | 0.9754  |
| Tyrosine                                  | 0.6         | 0.0183  | 1.2         | 0.4759  |
| Tryptophan                                | 0.9         | 0.2758  | 1.2         | 0.1897  |
| Glutamine                                 | 1.0         | 0.9610  | 1.1         | 0.5474  |
| Alanine                                   | 0.9         | 0.2079  | 0.9         | 0.2331  |
| Beta-alanine                              | 1.0         | 0.9161  | 1.0         | 0.9270  |
| Cysteine                                  | 0.7         | 0.3225  | 1.3         | 0.1305  |
| Valine                                    | 0.6         | 0.0032  | 0.7         | 0.1250  |
| <b>Nucleosides</b>                        |             |         |             |         |
| Uracil                                    | 0.7         | 0.0010  | 0.8         | 0.0852  |
| Hypoxanthine                              | 0.6         | 0.0001  | 0.8         | 0.0874  |
| Guanosine                                 | 0.8         | 0.5378  | N/A         | N/A     |
| Xanthine                                  | 0.6         | 0.0025  | 1.2         | 0.3615  |
| Inosine                                   | 0.9         | 0.7367  | 1.2         | 0.5014  |
| Adenine                                   | 1.1         | 0.3650  | 1.1         | 0.2165  |
| Adenosine                                 | 1.1         | 0.7265  | N/A         | N/A     |
| <b>Miscellaneous</b>                      |             |         |             |         |
| Ethanolamine                              | 0.6         | 0.0020  | 0.6         | 0.0009  |
| Phosphoric acid                           | 0.8         | 0.0006  | 0.7         | 0.0004  |
| GABA                                      | 0.8         | 0.0015  | 0.8         | 0.0814  |
| 4-hydroxybutyric acid                     | 0.5         | 0.0206  | 1.0         | 0.8531  |
| Vitamin B5                                | 0.5         | <0.0001 | 0.5         | <0.0001 |
| Glutaric acid                             | 0.8         | 0.0359  | 0.9         | 0.6399  |
| Ethylene glycol                           | 0.7         | 0.3541  | 0.6         | 0.0215  |
| Sugar phosphate                           | 0.9         | 0.8948  | 7.9         | <0.0001 |
| Gluconic acid                             | 0.7         | 0.1218  | 1.8         | 0.0643  |
| Methyl-phosphate                          | 1.1         | 0.3796  | 0.8         | 0.1991  |

**Supplementary Table S2.** Metabolites altered in abundance across the two brain regions analysed by GC-MS. Metabolites analysed in this study are listed and illustrated as separated metabolite-groups in the table. For each compound, fold-changes are reported as HD group/control group. After being tested by multiple comparison analysis (FDR-corrected), the metabolites significantly altered in abundance in HD were highlighted. In red are listed the compounds increased in HD and in blue those that are decreased.

| Brain region | CAG size (Control) |         | CAG size (HD) |         | Vonsattel grade (only HD) |         | Age      |         | PMD      |         | Brain-weight |         |
|--------------|--------------------|---------|---------------|---------|---------------------------|---------|----------|---------|----------|---------|--------------|---------|
|              | Spearman           | p-value | Spearman      | p-value | Spearman                  | p-value | Spearman | p-value | Spearman | p-value | Spearman     | p-value |
| <b>CB</b>    | 0.12               | 0.7100  | 0.17          | 0.3700  | 0.33                      | 0.0800  | -0.02    | 0.9100  | 0.10     | 0.4900  | 0.41         | <0.0050 |
| <b>SFG</b>   | -0.20              | 0.5100  | -0.01         | 0.9600  | 0.20                      | 0.3100  | 0.05     | 0.7300  | 0.18     | 0.2200  | 0.45         | <0.0050 |
| <b>PUT</b>   | 0.50               | 0.1800  | 0.14          | 0.7200  | 0.11                      | 0.8000  | 0.29     | 0.2600  | -0.30    | 0.2300  | 0.18         | 0.4700  |
| <b>MCTX</b>  | 0.52               | 0.1600  | -0.11         | 0.7900  | -0.26                     | 0.5000  | 0.25     | 0.3200  | -0.20    | 0.4200  | 0.16         | 0.5200  |
| <b>SCTX</b>  | 0.19               | 0.6300  | -0.02         | 0.9800  | -0.11                     | 0.8000  | 0.08     | 0.7500  | -0.30    | 0.2400  | 0.09         | 0.7200  |
| <b>GP</b>    | -0.15              | 0.7000  | -0.28         | 0.4700  | -0.34                     | 0.3700  | 0.44     | 0.0700  | -0.12    | 0.6400  | 0.23         | 0.3600  |
| <b>CG</b>    | 0.51               | 0.1700  | -0.15         | 0.7000  | -0.24                     | 0.5400  | 0.26     | 0.3000  | -0.34    | 0.1800  | 0.29         | 0.2500  |
| <b>SN</b>    | 0.10               | 0.8000  | -0.24         | 0.5500  | -0.24                     | 0.5400  | 0.35     | 0.1600  | -0.22    | 0.3900  | 0.41         | 0.1000  |
| <b>MFG</b>   | 0.35               | 0.3600  | 0.06          | 0.8900  | 0.14                      | 0.7200  | 0.08     | 0.7600  | -0.31    | 0.2200  | 0.14         | 0.5900  |
| <b>MTG</b>   | 0.23               | 0.5500  | -0.06         | 0.8900  | 0.06                      | 0.8800  | 0.18     | 0.4800  | -0.39    | 0.1200  | 0.17         | 0.5100  |
| <b>HP</b>    | 0.34               | 0.3700  | -0.17         | 0.6700  | 0.00                      | >0.9999 | 0.35     | 0.1600  | -0.54    | 0.0300  | 0.10         | 0.7100  |
| <b>ENT</b>   | 0.20               | 0.6100  | 0.08          | 0.8600  | 0.00                      | >0.9999 | 0.12     | 0.6600  | -0.28    | 0.2900  | -0.08        | 0.7600  |

**Supplementary Table S3.** Vitamin B5 shows no correlation with multiple study-group characteristics. Table showing the Spearman's coefficients ( $\rho$ ) and p-values obtained correlating vitamin B5 concentrations with different study-group characteristics. A correlation was considered significant only if  $\rho$  values  $>0.8$  (or  $<-0.8$ ) and p-values  $<0.01$ . The *HTT* CAG size of the longest allele was considered to assess potential correlations between vitamin B5 concentrations and *HTT* CAG repeats in controls and HD cases. For Vonsattel grade only HD cases were considered for correlation analyses. For age, PMD and brain-weight all the subjects included in the study were considered. No significant correlations of vitamin B5 with *HTT* CAG size, Vonsattel grade, age, PMD and brain-weight were observed in any of the brain regions analysed by GC-MS.

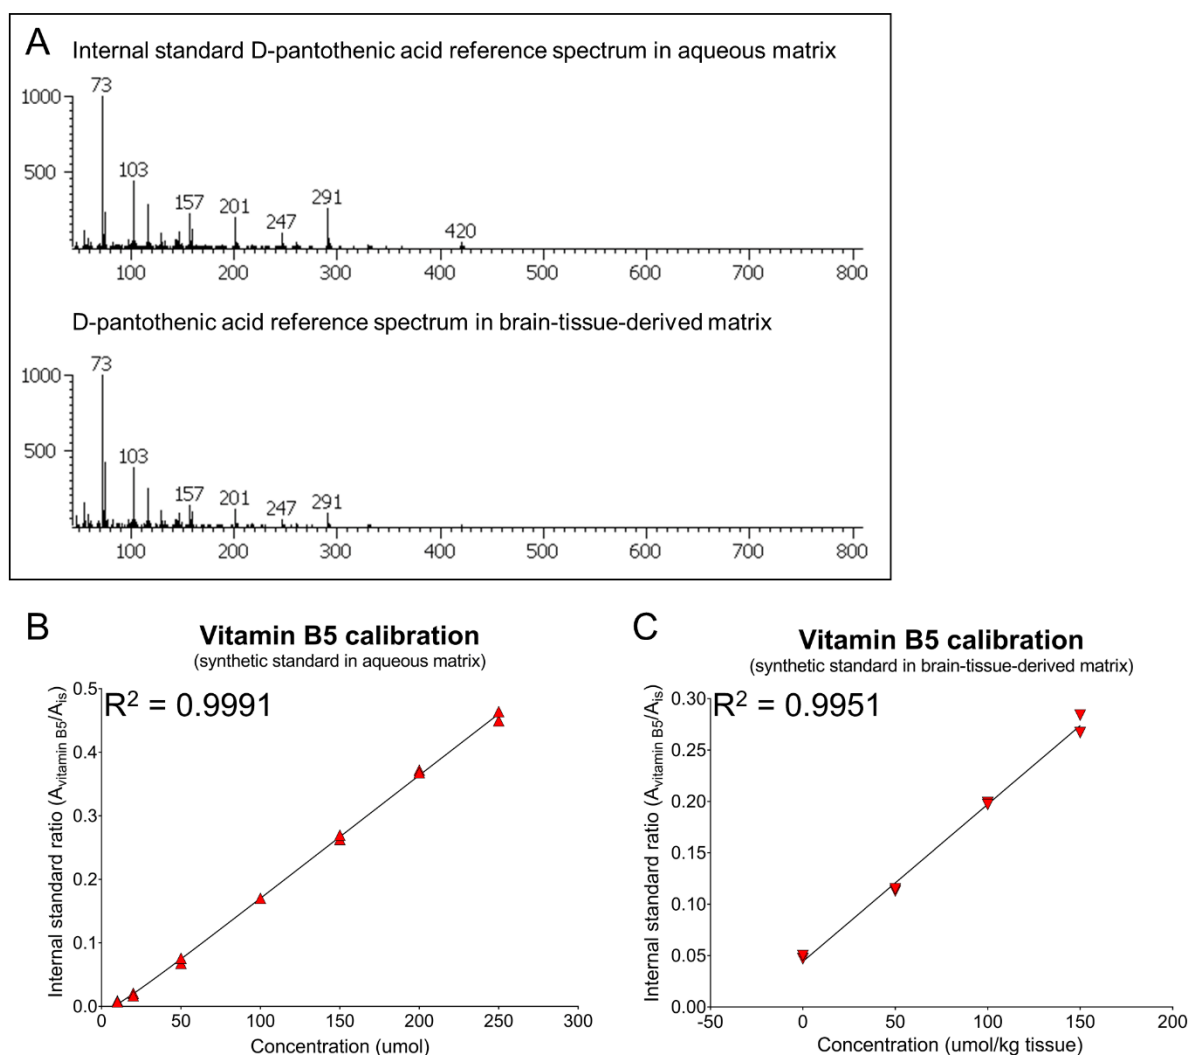

**Supplementary Figure S1.** Electron ionization (EI) spectra and calibration curves for vitamin B5 (D-pantothenic acid) derived from aqueous or human-brain-derived matrices. (A) Spectra showing EI fragmentation of analytical-grade D-pantothenic acid by GC-TOF derived from a solution in an aqueous matrix (top panel) or after addition to human-brain-extract pool (bottom panel). A library hit-matching score of 954/1000 (i.e. extremely high) was obtained by comparing the two spectra. (B) 7-point calibration curve of pure D-pantothenic acid standards. For each point, ratios of D-pantothenic acid-peak areas to corresponding internal standard areas (of citric acid-d4) were plotted against the concentrations ( $\mu\text{mol}$ ) of the analytical-grade D-pantothenic acid standards. For each concentration, synthetic standards were run in duplicate. The excellent linearity observed ( $R^2=0.9991$ ) demonstrates the stability of D-pantothenic acid in our GC-MS platform. (C) Calibration curve used to determine the concentration of D-pantothenic acid in HD and control subjects. A large number of tissue samples were extracted and pooled together to obtain a matrix representative of the subjects and brain regions examined in our study. To obtain a calibration curve, increasing concentrations of analytical-grade D-pantothenic acid standards were added to a pool comprising a mixture of brain-extracts. For each point, ratios of D-pantothenic acid-peak areas to corresponding internal standard areas (citric acid-d4) were plotted against the concentrations of D-pantothenic acid and expressed as  $\mu\text{mol/kg}$  brain tissue. On the x-axis, the value 0 corresponds to the endogenous concentration of D-pantothenic acid in the pooled brain extracts. Each concentration in the calibration curve was run in duplicate. The excellent linearity ( $R^2=0.9951$ ) indicates that our GC-MS assay is well suited to measure D-pantothenic acid in human brain tissue. Abbreviation: IS, internal standard.

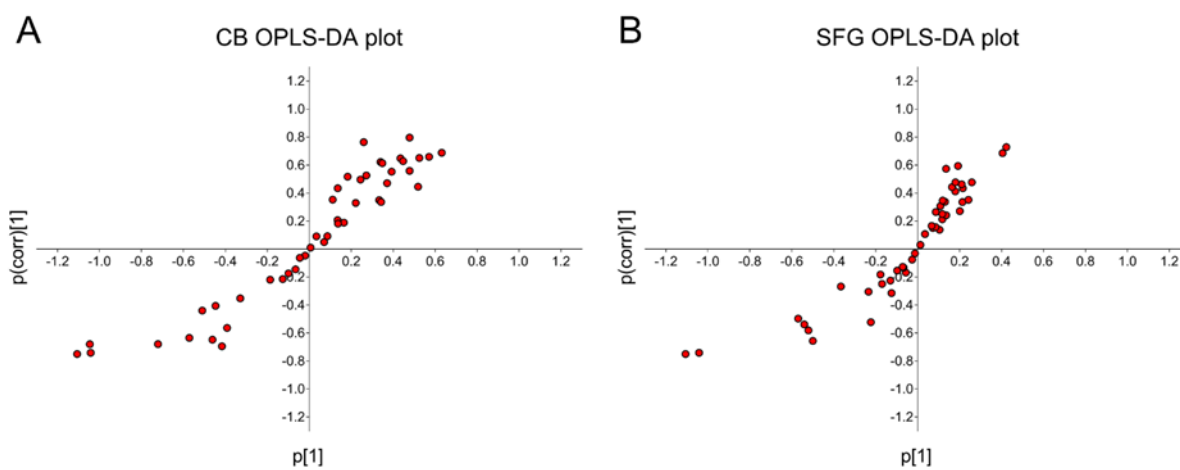

**Supplementary Figure S2.** S-plots of CB and SFG brain samples were analysed by GC-MS. (A, B) For CB and SFG samples, S-plots based on covariance ( $p[1]$ ) and correlation ( $p(\text{corr})[1]$ ) of the compounds belonging to the OPLS-DA were used to identify those metabolites contributing the most to the class separation observed in the model. Included in the list of most contributing were several sugars, alternative fuel sources metabolites, urea and vitamin B5

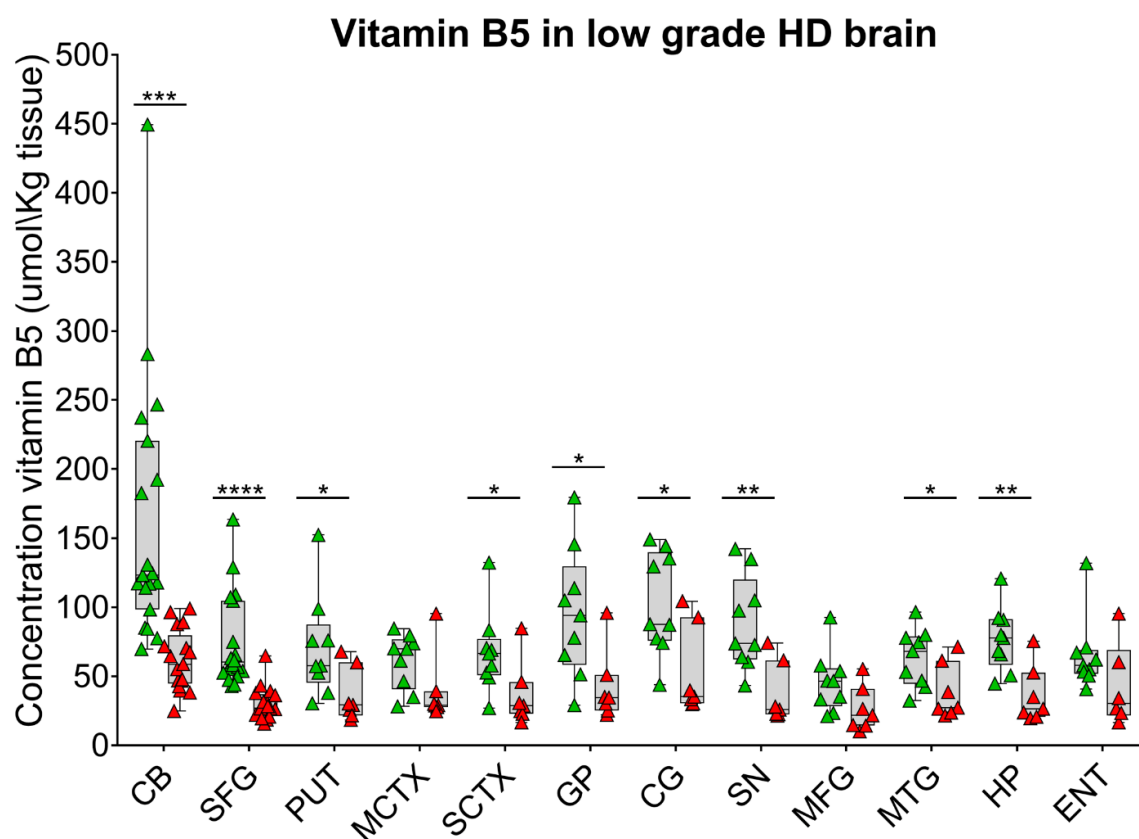

**Supplementary Figure S3.** Regional distribution of vitamin B5 concentrations in brain tissue illustrating lowered concentrations in cases with HD grades 0-2 compared with controls. Boxplots show distributions of individual vitamin B5 concentrations ( $\mu\text{mol/kg}$  tissue) in each of twelve named brain regions of controls (green triangles) and cases with low-grade pathology (red triangles). Vitamin B5 concentrations were significantly decreased in nine out of twelve brain regions examined from these cases with low-grade disease at the time of death, which typically exhibit mild to moderate neuronal loss from affected regions. Multiple *t*-tests were applied for regional case-control contrasts in the 12 functionally-distinct brain regions. Here, the study group comprised only low-grade HD cases ( $n=18$ , grades 0-2; red triangles), and all the controls ( $n=24$ ; green triangles); boxplots are means  $\pm$  95% CI. Abbreviations: \*,  $p<0.05$ ; \*\*,  $<0.005$ ; \*\*\*,  $<0.001$ ; \*\*\*\*,  $<0.0001$ .

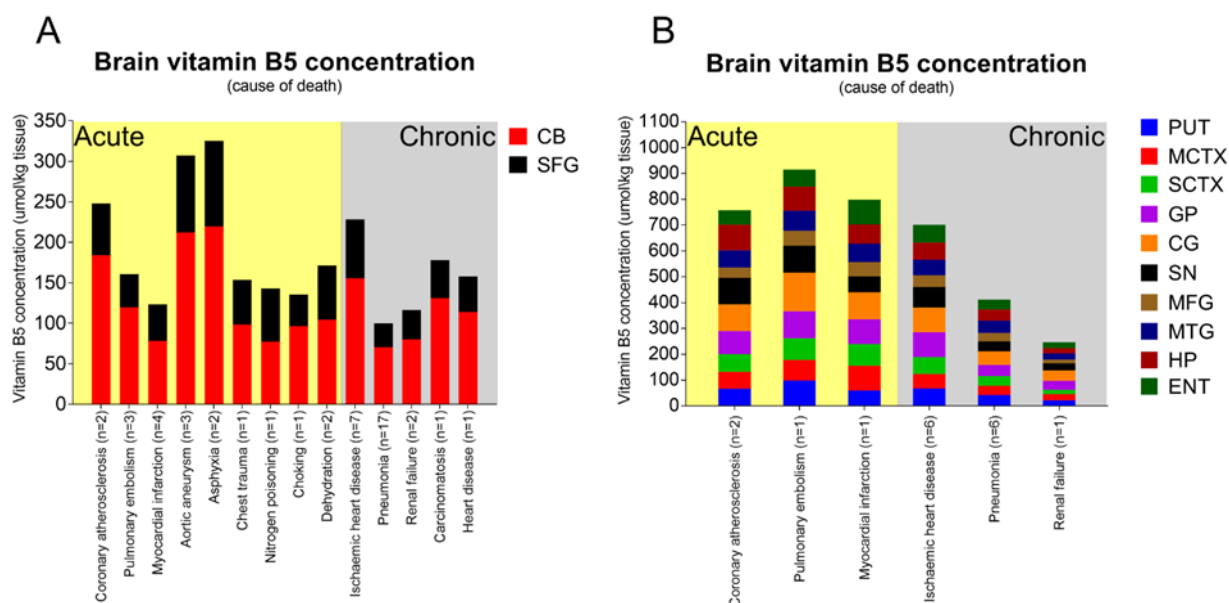

**Supplementary Figure S4.** Shown is the relationship between causes of death and vitamin B5 concentrations in human brain. (A, B) Stacked barplots indicate the contribution that each region has on the cumulative distribution of vitamin B5 in brain (in μmol/kg tissue). The bars are based on individual COD and sub-divided by acute (yellow background) or chronic (grey background) modes of death. The number of subjects (n) available for each COD reported in the study are provided in the x-axis text. COD from all HD cases and controls were included. Abbreviation: COD, cause of death.

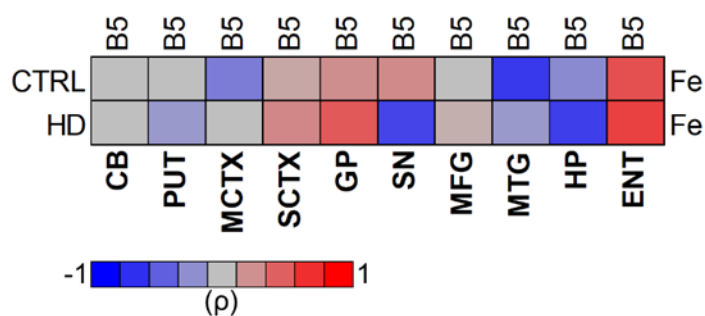

**Supplementary Figure S5.** Correlation between vitamin B5 and iron in human brain. Heatmap illustrating the correlation of vitamin B5 concentrations (μmol/kg wet tissue) with Fe (μmol/kg dry-weight) in individual brain regions of HD mutation-carriers and matched controls. Colours indicate the degree of correlation of vitamin B5 with the levels of Fe in controls (upper) and cases (lower). Spearman's correlation coefficient (ρ) values are visually represented by the colour gradient scale in the bottom panel. No significant differences in co-regulation of vitamin B5 and Fe were observed in any of the brain regions examined. The statistical significance of differences in co-regulation between correlations in controls and HD groups was determined by Fisher r-to-z transformation and resulting p-values < 0.05 (two-tailed) were considered significant. Abbreviation: Fe, iron.



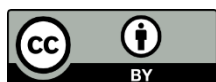

© 2019 by the authors. Submitted for possible open access publication under the terms and conditions of the Creative Commons Attribution (CC BY) license (<http://creativecommons.org/licenses/by/4.0/>).
